# Supplementary material for: Improving remote sensing-based net primary production estimation in the grazed land with defoliation formulation model
Source: Springer Nature journal article supplement (doi:10.1007/s11629-018-5200-2), 2019-02-01
Supplement: 11629_2018_5200_MOESM1_ESM.pdf [file 11629_2018_5200_MOESM1_ESM.pdf]

The following Appendixes ([Appendix 1](#)) are the Electronic Supplementary Material of the article entitled “Improving remote sensing-based net primary production estimation in the grazed land with defoliation formulation model” at <https://doi.org/10.1007/s11629-018-5200-2>.

**Appendix 1** Validation points across Xinjiang’s grassland biomes. NPP: Net primary Productivity outside enclosure ( $\text{gC}\cdot\text{m}^{-2}\cdot\text{yr}^{-1}$ ); NPP\_Nongra: Net primary Productivity inside enclosure ( $\text{gC}\cdot\text{m}^{-2}\cdot\text{yr}^{-1}$ )

| No. | Site description | Lat.(°) | Lon.(°) | NPP value ( $\text{gC}\cdot\text{m}^{-2}$ ) | Reference           |
|-----|------------------|---------|---------|---------------------------------------------|---------------------|
| 1   | NPP_Nongra       | 81.28   | 43.257  | 354                                         | (Zhang et al. 2008) |
| 2   | NPP_Nongra       | 87.358  | 43.628  | 382                                         | (Fan et al. 2009)   |
| 3   | NPP_Nongra       | 81.238  | 42.641  | 429.92                                      | (Yan 2009)          |
| 4   | NPP_Nongra       | 80.75   | 41.772  | 315                                         | (Zhang et al. 2012) |
| 5   | NPP_Nongra       | 89.52   | 44.15   | 305.61                                      | This study          |
| 6   | NPP_Nongra       | 89.53   | 43.69   | 294.97                                      | This study          |
| 7   | NPP_Nongra       | 89.53   | 43.63   | 600.75                                      | This study          |
| 8   | NPP_Nongra       | 83.72   | 42.9    | 344.03                                      | This study          |
| 9   | NPP_Nongra       | 87.19   | 43.55   | 306.89                                      | This study          |
| 10  | NPP              | 93.87   | 35.51   | 73.55                                       | (Yang et al. 2010)  |
| 11  | NPP              | 90.18   | 46.11   | 79.585                                      | (Yang et al. 2010)  |
| 12  | NPP              | 86.82   | 47.53   | 124.0335                                    | (Yang et al. 2010)  |
| 13  | NPP              | 86.18   | 47.28   | 168.85                                      | (Yang et al. 2010)  |
| 14  | NPP              | 86.02   | 46.6    | 182.6993                                    | (Yang et al. 2010)  |
| 15  | NPP              | 89.49   | 47.06   | 195.2027                                    | (Yang et al. 2010)  |
| 16  | NPP              | 81.15   | 45.02   | 198.0535                                    | (Yang et al. 2010)  |
| 17  | NPP              | 86.1    | 46.69   | 211.4071                                    | (Yang et al. 2010)  |
| 18  | NPP              | 87.75   | 47.73   | 224.2106                                    | (Yang et al. 2010)  |
| 19  | NPP              | 87.75   | 47.73   | 224.9107                                    | (Yang et al. 2010)  |
| 20  | NPP              | 92.3    | 43.69   | 228.5618                                    | (Yang et al. 2010)  |
| 21  | NPP              | 90.05   | 46.44   | 232.0127                                    | (Yang et al. 2010)  |
| 22  | NPP              | 84.03   | 43.3    | 271.1232                                    | (Yang et al. 2010)  |
| 23  | NPP              | 87.01   | 48.07   | 281.7261                                    | (Yang et al. 2010)  |
| 24  | NPP              | 94.01   | 43.42   | 297.0302                                    | (Yang et al. 2010)  |
| 25  | NPP              | 84.22   | 45.58   | 300.5312                                    | (Yang et al. 2010)  |
| 26  | NPP              | 84.42   | 43.45   | 302.4317                                    | (Yang et al. 2010)  |
| 27  | NPP              | 84.83   | 44.14   | 315.2851                                    | (Yang et al. 2010)  |
| 28  | NPP              | 90.3    | 43.76   | 323.1373                                    | (Yang et al. 2010)  |
| 29  | NPP              | 90.01   | 46.54   | 337.5411                                    | (Yang et al. 2010)  |
| 30  | NPP              | 81.61   | 44.6    | 347.1938                                    | (Yang et al. 2010)  |
| 31  | NPP              | 86.65   | 47.13   | 358.3468                                    | (Yang et al. 2010)  |
| 32  | NPP              | 84.37   | 43.15   | 384.5038                                    | (Yang et al. 2010)  |
| 33  | NPP              | 83.56   | 45.79   | 390.1553                                    | (Yang et al. 2010)  |
| 34  | NPP              | 83.65   | 45.59   | 400.9083                                    | (Yang et al. 2010)  |
| 35  | NPP              | 86.52   | 46.97   | 408.2103                                    | (Yang et al. 2010)  |
| 36  | NPP              | 85.77   | 43.96   | 408.2103                                    | (Yang et al. 2010)  |
| 37  | NPP              | 83.5    | 43.41   | 425.715                                     | (Yang et al. 2010)  |
| 38  | NPP              | 82.24   | 43.39   | 426.9153                                    | (Yang et al. 2010)  |
| 39  | NPP              | 84.4    | 43.66   | 428.3157                                    | (Yang et al. 2010)  |
| 40  | NPP              | 81.46   | 44.61   | 436.7679                                    | (Yang et al. 2010)  |
| 41  | NPP              | 90.61   | 43.65   | 461.8247                                    | (Yang et al. 2010)  |
| 42  | NPP              | 83.72   | 42.9    | 464.8255                                    | (Anwar et al. 2006) |
| 43  | NPP              | 87.17   | 43.47   | 467.9764                                    | (Yang et al. 2010)  |
| 44  | NPP              | 81.15   | 44.49   | 469.3267                                    | (Yang et al., 2010) |
| 45  | NPP              | 81.38   | 44.62   | 482.7304                                    | (Yang et al. 2010)  |

### References:

- Anwar M, Yang Y, Guo Z, et al. (2006) Carbon contents and its vertical distribution in alpine grasslands in Bayinbulak, middle stretch of the Tianshan mountains of Xinjiang. *Chinese Journal of Plant Ecology* 30: 545-552. <https://doi.org/10.17521/cjpe.2006.0072>
- Fan YM, Sun ZJ, Wu Q, et al. (2009) Influences of fencing on vegetation and soil properties in mountain steppe. *Pratacultural Science* 26(3): 79-82. (In Chinese).
- Yan XH (2009) Study on change of grassland community of the stipa capillate herbage and lambs eating and growing in warm season.

Master Degree, Xinjiang Agricultural University, China. (In Chinese).

Yang YH, Fang JY, Ma WD, et al. (2010) Large-scale pattern of biomass partitioning across China's grasslands. *Global Ecology and Biogeography* 19(2): 268-277. <https://doi.org/10.1111/j.1466-8238.2009.00502.x>

Zhang, RH, An SZ, Yang HK, et al. (2008) Effect of Different Grazing Intensities on Spring Community of *Stipa capillata* Grassland in Xinjiang. *Xinjiang Agricultural Sciences* 45(3): 570-574. <https://doi.org/10.6048/j.issn.1001-4330.2012.03.023> (In Chinese).

Zhang XH, An SZ, Wang Y, et al. (2012) The Effect on Main Quantitative Characters of Mowing and Grazing Alternating Use on the Grassland Vegetation. *Xinjiang Agricultural Sciences* 49(3): 549-554. <https://doi.org/10.6048/j.issn.1001-4330.2012.03.023> (In Chinese).
